# Supplementary material
Source: MDPI journal article supplement (https://www.mdpi.com/search?q=metabolites-10-00095)
Supplement: s001 [file metabolites-10-00095-s001.pdf]

Supplementary Table 1. Metabolites of Wagyu and Holstein Beef.

| Metabolite                          | Wagyu-1 | Wagyu-2 | Wagyu-3 | Wagyu-4 | Holstein-1 | Holstein-2 | Holstein-3 | Holstein-4  | Average (Wagyu) | Average (Holstein) | StdDev (Wagyu) | StdDev (Holstein) |
|-------------------------------------|---------|---------|---------|---------|------------|------------|------------|-------------|-----------------|--------------------|----------------|-------------------|
| Boric acid-3TMS                     | 108491  | 129988  | 124724  | 135018  | 166437     | 172015     | 125108     | 99914       | 124555.1235     | 140868.4345        | 11504.60382    | 34397.27463       |
| Pyruvic acid-meto-TMS               | 7087    | 6350    | 7397    | 5209    | 11188      | 10712      | 8743       | 8293        | 6510.790228     | 9733.906998        | 972.5009425    | 1429.795727       |
| Alanine-2TMS                        | 5758760 | 5581943 | 4857522 | 6202538 | 7068333    | 7472708    | 9466398    | 8209049     | 5600191.002     | 8054122.014        | 559718.9804    | 1053304.093       |
| 3-Hydroxypropionic acid-2TMS        | 9845    | 9014    | 6620    | 6281    | 7657       | 8217       | 7363       | 12018       | 7940.009177     | 8814.00901         | 1758.375672    | 2165.400405       |
| 3-Hydroxybutyric acid-2TMS          | 29073   | 39894   | 42822   | 27856   | 33321      | 56655      | 40045      | 42525       | 34911.25791     | 43136.70267        | 7555.991768    | 9815.683717       |
| Valine-2TMS                         | 131562  | 100640  | 96764   | 127391  | 132084     | 146569     | 173327     | 181684      | 114089.4794     | 158416.1312        | 17918.89585    | 23075.81775       |
| Urea-2TMS                           | 1087770 | 1021686 | 914316  | 1003546 | 652169     | 1016388    | 740401     | 1446654     | 1006829.353     | 963903.0824        | 71511.29179    | 357274.1087       |
| 4-Hydroxybutyric acid-2TMS          | 68953   | 82758   | 75189   | 84952   | 89792      | 101276     | 88398      | 119253      | 77962.78716     | 99679.36094        | 7319.135333    | 14267.64098       |
| Leucine-2TMS                        | 1233053 | 1092716 | 966212  | 1413790 | 1261932    | 1250119    | 1815195    | 1810407     | 1176442.676     | 1534413.248        | 192133.2932    | 321496.5438       |
| Glycerol-3TMS                       | 985978  | 1296178 | 1223429 | 1181738 | 1213475    | 1526082    | 1060654    | 1337328     | 1171830.663     | 1284384.893        | 132619.8134    | 196896.2014       |
| Phosphoric acid-3TMS                | 5513416 | 5396048 | 5484001 | 5727029 | 8736379    | 8028158    | 7568643    | 8318202     | 5530123.568     | 8162845.308        | 140421.5227    | 491356.4529       |
| allo-Isoleucine-2TMS                | 642740  | 530836  | 475911  | 674584  | 636051     | 641474     | 834455     | 914212      | 581017.6821     | 756548.0312        | 93327.35052    | 139867.8866       |
| Isoleucine-2TMS                     | 642740  | 530836  | 475911  | 674584  | 636051     | 641474     | 834455     | 914212      | 581017.6821     | 756548.0312        | 93327.35052    | 139867.8866       |
| Proline-2TMS                        | 502822  | 391883  | 397310  | 378730  | 513982     | 541535     | 667016     | 558215      | 417686.1981     | 570187.1137        | 57290.76578    | 67079.73464       |
| Succinic acid-2TMS                  | 177895  | 127854  | 125999  | 212561  | 282671     | 197191     | 158027     | 283541      | 161077.1908     | 230357.5583        | 41903.52539    | 62973.18789       |
| Glyceric acid-3TMS                  | 1580013 | 1503791 | 1764038 | 1649784 | 2645712    | 2263360    | 2836678    | 2621037     | 1624406.576     | 2591696.632        | 110544.0835    | 239164.9071       |
| Glyceric acid-3TMS                  | 24545   | 28112   | 42572   | 24743   | 46966      | 35189      | 25057      | 31778       | 29993.15792     | 34747.29931        | 8544.063696    | 9168.891637       |
| Nonanoic acid-TMS                   | 14350   | 44802   | 19640   | 38887   | 38011      | 17896      | 27526      | 38046       | 29419.67284     | 30369.64036        | 14708.255      | 9678.023853       |
| Serine-3TMS                         | 534221  | 503600  | 455372  | 659837  | 606621     | 599154     | 1134447    | 906471      | 538122.4325     | 811423.1579        | 87381.97888    | 258027.9885       |
| Threonine-3TMS                      | 74301   | 70254   | 64028   | 87330   | 101437     | 100026     | 141010     | 122303      | 73978.53894     | 116194.2008        | 9853.071868    | 19427.84673       |
| 3-Aminopropanoic acid-3TMS          | 247282  | 236421  | 243450  | 204654  | 370371     | 272552     | 210065     | 322381      | 232952.001      | 293842.0747        | 19393.7961     | 86660.86838       |
| Niacinamide-TMS                     | 104516  | 98280   | 115214  | 110954  | 179156     | 132581     | 144109     | 177880      | 107240.7922     | 158431.7926        | 7418.102566    | 23672.43475       |
| Malic acid-3TMS                     | 102056  | 185748  | 87179   | 95131   | 145032     | 196181     | 127510     | 143065      | 117528.486      | 152947.1623        | 45884.09931    | 29869.36869       |
| Methionine-2TMS                     | 16416   | 17355   | 15051   | 21946   | 18584      | 15940      | 27610      | 28891       | 17691.91886     | 22756.20936        | 2989.807672    | 6456.741418       |
| 5-Oxoproline-2TMS                   | 82415   | 86904   | 99632   | 100792  | 135925     | 155448     | 211179     | 169470      | 92435.72956     | 168005.6756        | 9176.638194    | 31900.5277        |
| 4-Aminobutyric acid-3TMS            | 24929   | 37175   | 31466   | 21796   | 41640      | 47291      | 28955      | 48814       | 28841.51477     | 41674.9454         | 6862.202659    | 9024.142109       |
| Cysteine-3TMS                       | 74929   | 72657   | 55302   | 99940   | 74996      | 82082      | 116190     | 104496      | 75706.96017     | 94441.00073        | 18380.41272    | 19191.96153       |
| Creatinine-3TMS                     | 3057912 | 1991838 | 2872729 | 2244925 | 3604715    | 4427858    | 2873285    | 3780283     | 2541850.962     | 3671534.903        | 505463.0612    | 639144.8583       |
| 2-Hydroxyglutaric acid-3TMS         | 7517    | 7517    | 3529    | 4643    | 11368      | 6640       | 13888      | 5801.378021 | 34784.37167     | 12728.58135        | 2032.403716    | 5337.039605       |
| Hypotaurine-3TMS                    | 22773   | 20863   | 21030   | 24850   | 23419      | 41771      | 29794      | 27047       | 22379.01287     | 30507.91937        | 1860.359566    | 7949.739115       |
| Ornithine-3TMS                      | 41209   | 36758   | 31692   | 46365   | 46108      | 63327      | 99837      | 57341       | 39006.07005     | 66653.08761        | 12345.549563   | 23245.71342       |
| Glutamic acid-3TMS                  | 5303    | 4779    | 5164    | 6240    | 5122       | 6023       | 10213      | 7064        | 5371.556514     | 7105.658575        | 618.6632182    | 2218.427903       |
| Phenylalanine-2TMS                  | 298201  | 269099  | 256083  | 349479  | 311468     | 295712     | 405103     | 412437      | 293215.6703     | 356179.8093        | 41436.20039    | 61138.74443       |
| Asparagine-3TMS                     | 44428   | 38019   | 32553   | 44443   | 40592      | 57117      | 79481      | 71868       | 39860.65645     | 62264.65695        | 5734.313322    | 17173.62281       |
| Taurine-3TMS                        | 528392  | 755071  | 217664  | 493440  | 654737     | 1538811    | 279627     | 423283      | 498641.9214     | 724114.4944        | 220315.3687    | 564686.6598       |
| Ribose-meto-4TMS                    | 360227  | 357621  | 400437  | 608835  | 280658     | 349486     | 340231     | 417247      | 431780.0627     | 346905.1686        | 119652.6795    | 55939.89078       |
| Xylitol-5TMS                        | 23217   | 29620   | 22552   | 31193   | 16256      | 16117      | 19361      | 20695       | 26645.49692     | 18107.17132        | 4398.566875    | 2284.704195       |
| Glutamine-4TMS                      | 32646   | 30961   | 39478   | 36053   | 66519      | 95599      | 140036     | 88000       | 34784.37167     | 97538.54871        | 3778.550293    | 30892.16953       |
| Putrescine-4TMS                     | 29207   | 29502   | 28404   | 36508   | 33465      | 45393      | 31228      | 46414       | 30905.53501     | 39124.93993        | 3763.934688    | 7891.005129       |
| Glycerol 3-phosphate-4TMS           | 35104   | 22524   | 18725   | 18244   | 21071      | 25759      | 17829      | 20881       | 23649.12738     | 21385.04967        | 7872.811299    | 3272.645496       |
| Hypoxanthine-2TMS                   | 431018  | 522360  | 456897  | 687969  | 529320     | 597579     | 596117     | 655573      | 524561.1084     | 594646.9923        | 115521.7107    | 51608.70822       |
| Arginine-3TMS                       | 18643   | 22530   | 18590   | 28231   | 23759      | 30274      | 42687      | 32717       | 21998.46181     | 32359.11557        | 4546.134929    | 7854.812351       |
| Ornithine-4TMS                      | 70297   | 54041   | 80826   | 69745   | 93784      | 191141     | 94812      | 58515       | 68727.24233     | 109563.099         | 11038.95943    | 56942.81863       |
| Fructose-meto-5TMS(1)               | 661048  | 439588  | 831962  | 745895  | 499429     | 881554     | 550658     | 706765      | 669623.2537     | 659601.6707        | 168484.6626    | 172251.2272       |
| Fructose-meto-5TMS(2)               | 442314  | 307814  | 566889  | 511890  | 345108     | 585310     | 371109     | 485239      | 457226.8245     | 446691.3134        | 111893.3736    | 110653.8352       |
| Mannose-meto-5TMS(1)                | 1039327 | 728081  | 1373858 | 1109241 | 597751     | 1266681    | 774374     | 917746      | 1062626.697     | 889138.0026        | 265519.4663    | 283686.9156       |
| Glucose-meto-5TMS(1)                | 5260507 | 4202704 | 6055536 | 5499939 | 4429115    | 6843592    | 5140265    | 5875251     | 5254671.443     | 5572056.008        | 776360.8303    | 1033035.722       |
| Lysine-4TMS                         | 232805  | 218611  | 178507  | 245823  | 183406     | 235620     | 327136     | 292265      | 218996.5047     | 259606.9131        | 29153.82352    | 63268.25139       |
| Glucose-meto-5TMS(2)                | 910859  | 743728  | 1022639 | 946935  | 731100     | 1202572    | 883462     | 1014008     | 906040.34       | 957785.4495        | 117807.9134    | 199993.0701       |
| Tyrosine-3TMS                       | 11307   | 9699    | 9988    | 13066   | 11367      | 10756      | 19039      | 17080       | 11015.23237     | 14560.19231        | 1535.984445    | 4126.189916       |
| Sorbitol-6TMS                       | 144679  | 125900  | 164786  | 124860  | 123565     | 192949     | 125474     | 89351       | 140056.3116     | 132834.8455        | 18834.83976    | 43376.75228       |
| Xanthine-3TMS                       | 51826   | 46441   | 39743   | 62282   | 49878      | 64733      | 52547      | 55840       | 50073.13964     | 55749.47074        | 9522.394151    | 6466.392185       |
| Glucosylated-6TMS                   | 17625   | 12262   | 22208   | 21258   | 19863      | 25988      | 21216      | 20440       | 18338.32442     | 21876.64979        | 4506.408761    | 2796.223726       |
| Palmitic acid-TMS                   | 86529   | 140016  | 64488   | 61882   | 68838      | 64951      | 48715      | 58335       | 88228.69763     | 60210.0165         | 36252.17363    | 8804.679284       |
| Uric acid-4TMS                      | 11039   | 10666   | 12031   | 8803    | 21712      | 28697      | 17625      | 19875       | 10634.82289     | 21976.88778        | 1350.578239    | 4781.428404       |
| Inositol-6TMS(2)                    | 334931  | 417479  | 346839  | 359912  | 372970     | 562277     | 383622     | 410536      | 364790.537      | 432351.1557        | 36577.48475    | 88047.76216       |
| Ribose 5-phosphate-meto-5TMS(1)     | 38944   | 28334   | 32419   | 26826   | 55696      | 82576      | 64725      | 74927       | 31630.90104     | 69481.02069        | 5417.678368    | 11744.42073       |
| Stearic acid-TMS                    | 53392   | 126340  | 47636   | 42212   | 46540      | 71659      | 41701      | 49358       | 67395.11441     | 52314.46509        | 39561.00676    | 13278.49684       |
| Tryptophan-3TMS                     | 115691  | 91992   | 91951   | 113046  | 102824     | 122334     | 154462     | 161533      | 103170.1568     | 135288.0752        | 12975.75702    | 27556.88016       |
| Fructose 6-phosphate-meto-6TMS      | 307102  | 160955  | 420103  | 191870  | 226699     | 441525     | 265786     | 421286      | 270007.5775     | 338824.0217        | 118184.3689    | 108403.8819       |
| Glucose 6-phosphate-meto-6TMS(1)    | 669686  | 359146  | 876425  | 428630  | 467099     | 892978     | 553108     | 863271      | 583471.7872     | 694113.88          | 236327.6663    | 215700.0151       |
| Glucose 6-phosphate-meto-6TMS(2)    | 103067  | 53237   | 133937  | 61831   | 74000      | 118517     | 89280      | 147721      | 88017.97832     | 112379.385         | 37552.0257     | 36233.90526       |
| Inosine-4TMS                        | 266820  | 207200  | 295579  | 268746  | 346064     | 417187     | 354948     | 460582      | 259586.3188     | 394695.1676        | 37309.99837    | 54134.66095       |
| Sedoheptulose 7-phosphate-meto-7TMS | 50160   | 104126  | 52864   | 109824  | 55235      | 53261      | 52772      | 100239      | 79243.42467     | 65376.73844        | 32124.8112     | 23265.75112       |
| Maltose-meto-8TMS(1)                | 65107   | 80172   | 84889   | 54705   | 19426      | 54085      | 41840      | 45552       | 71218.15106     | 40225.87277        | 13869.80992    | 14783.81083       |
| Inosine monophosphate-5TMS          | 267357  | 144399  | 218416  | 87743   | 332235     | 322621     | 348172     | 316632      | 179478.9507     | 329915.0867        | 79340.4282     | 13763.70517       |
